# Supplementary material for: Anti SARS-CoV-2 Monoclonal Antibodies in Pre-Exposure or Post-Exposure in No- or Weak Responder to Vaccine Kidney Transplant Recipients: Is One Strategy Better than Another?
Source: MDPI journal article supplement (doi:10.3390/v16030381), 2024-02-29
Supplement: s1 [file s1]

---

**Table S1.** Baseline patients characteristics.

|                                                  |                 |
|--------------------------------------------------|-----------------|
| Age-Years                                        | 56,7 ± 14,1     |
| Male sex, n (%)                                  | 104 (58)        |
| Time from kidney transplantation, median (range) | 64,6 (33,5-146) |
| Kidney transplantation <3 months, n (%)          | 2 (1,1)         |
| Transplant number                                | 1,2             |
| <b>Induction therapy for KT n (%):</b>           |                 |
| ATG                                              | 83 (46,4)       |
| Anti-R-IL2                                       | 92 (51,4)       |
| Unkown                                           | 4 (2,2)         |
| eGFR- mL/min/1.73m <sup>2</sup>                  | 44 ± 20,2       |
| Body mass index, kg/m <sup>2</sup>               | 27,0 ± 5,0      |
| <b>Nephropathy :</b>                             |                 |
| Other cause, n (%)                               | 1 (0,6)         |
| Diabetes, n (%)                                  | 8 (4,5)         |
| Glomerulonephritis, n (%)                        | 74 (41,3)       |
| Unkown cause, n (%)                              | 14 (7,8)        |
| Interstitial nephropathy, n (%)                  | 14 (7,8)        |
| Hypertension, n (%)                              | 12 (6,7)        |
| Malformative uropathy, n (%)                     | 20 (11,1)       |
| Polycystic kidney, n (%)                         | 36 (20)         |
| <b>Comorbidities :</b>                           |                 |
| Hypertension, n (%)                              | 146 (81,6)      |
| RAS blockers, n (%)                              | 87 (59,6)       |
| Diabetes, n (%)                                  | 46 (25,6)       |
| Insulin, n (%)                                   | 28 (60,8)       |
| Cardiac disease, n (%)                           | 63 (35,2)       |
| Vascular disease, n (%)                          | 16 (8,9)        |
| Respiratory disease, n (%)                       | 26 (14,5)       |
| Cancer, n (%)                                    | 35 (19,5)       |
| Active smoking, n (%)                            | 18 (10)         |
| Former smoker, n (%)                             | 61 (34)         |
| Cirrhosis, n (%)                                 | 9 (5)           |
| <b>Immunosupressive drugs at inclusion :</b>     |                 |
| Mycophenolic acid, n (%)                         | 154 (86)        |
| Azathioprine, n (%)                              | 12 (6,7)        |
| Ciclosporin, n (%)                               | 16 (8,9)        |
| mTOR inhibitor, n (%)                            | 3 (1,7)         |
| Tacrolimus, n (%)                                | 128 (71,5)      |
| Belatacept, n (%)                                | 29 (16,2)       |
| Corticosteroids, n (%)                           | 101 (56,4)      |

---

Data are given as mean  $\pm$  SD, median  $\pm$  IQR, n number ; KT, kidney transplant ; mTOR, mammalian target of rapamycin ; ATG, antithyroglobulin ; RAS, renin-angiotensin system.

**Table S2.** COVID-19 disease presentation, management and clinical outcomes.

|                                               |            |
|-----------------------------------------------|------------|
| <b>Symptoms, n (%) :</b> n = 170              | 144 (80,4) |
| Cough, n (%)                                  | 75 (44,1)  |
| Fever, n (%)                                  | 50 (29,4)  |
| Rhinitis, n (%)                               | 49 (28,8)  |
| Asthenia, n (%)                               | 46 (27)    |
| Myalgia, n (%)                                | 27 (15,9)  |
| Diarrhea, n (%)                               | 27 (15,9)  |
| Dyspnea, n (%)                                | 25 (14,7)  |
| Odynophagia, n (%)                            | 20 (11,7)  |
| Headaches, n (%)                              | 19 (11,2)  |
| <b>Imagery, n (%) :</b>                       | 28 (15,6)  |
| Radiography, n (%)                            | 7 (25)     |
| Pulmonary computed tomography, n (%)          | 21 (75)    |
| <b>Antibiotic, n (%) :</b>                    | 21 (11,7)  |
| Piperacillin/tazobactam, n (%)                | 9 (42,8)   |
| Rovamycin, n (%)                              | 7 (33,3)   |
| Ceftriaxone, n (%)                            | 6 (28,6)   |
| Daptomycin, n (%)                             | 1 (4,7)    |
| Cefepime, n (%)                               | 1 (4,7)    |
| Quinolone, n (%)                              | 4 (19)     |
| Amoxicilline clavulanate, n (%)               | 3 (14)     |
| Amoxicillin, n (%)                            | 1 (4,7)    |
| Caspofungin, n (%)                            | 1 (4,7)    |
| Metronidazole, n (%)                          | 1 (4,7)    |
| Dexamethasone, n (%)                          | 14 (7,8)   |
| Convalescent plasma, n (%)                    | 5 (2,8)    |
| Oxygen therapy, n (%)                         | 21 (11,7)  |
| Acute renal injury, n (%)                     | 23 (12,9)  |
| Hospitalization, n (%)                        | 32 (17,9)  |
| Hospitalization in intensive care unit, n (%) | 7 (3,9)    |
| Death, n (%)                                  | 6 (3,3)    |

n, number.
